# Supplementary material for: Effective surface diffusion of nickel on single crystal β-Ga2O3for Schottky barrier modulation and high thermal stability
Source: Royal Society of Chemistry journal article supplement (doi:10.1039/c9tc02922b), 2019-01-01
Supplement: c9tc02922b1.pdf [file c9tc02922b1.pdf]

## *Supporting Information*

# Effective surface diffusion of nickel on single crystal $\beta$ -Ga<sub>2</sub>O<sub>3</sub> for Schottky barrier modulation and high thermal stability

Hojoong Kim,<sup>a</sup> Sinsu Kyoung,<sup>b</sup> Taiyoung Kang,<sup>b</sup> Jang-Yeon Kwon,<sup>c</sup> Kyung Hwan Kim,<sup>d</sup> and  
You Seung Rim<sup>\*,a</sup>

<sup>a</sup>School of Intelligent Mechatronics Engineering, Sejong University, 209 Neungdong-ro,  
Gwangjin-gu, Seoul 05006, Republic of Korea. E-mail: youseung@sejong.ac.kr

<sup>b</sup>Research and Development, Powercubesemi Inc., Sujeong-gu, Seongnam-si, Gyeonggi-do  
13449, Republic of Korea

<sup>c</sup>School of Integrated Technology and Yonsei Institute of Convergence Technology, Yonsei  
University, Yeonsu-gu, Incheon 21983, Republic of Korea

<sup>d</sup>Department of Electrical Engineering, Gachon University, Sujeong-gu, Seongnam-si,  
Gyeonggi-do 13120, Republic of Korea

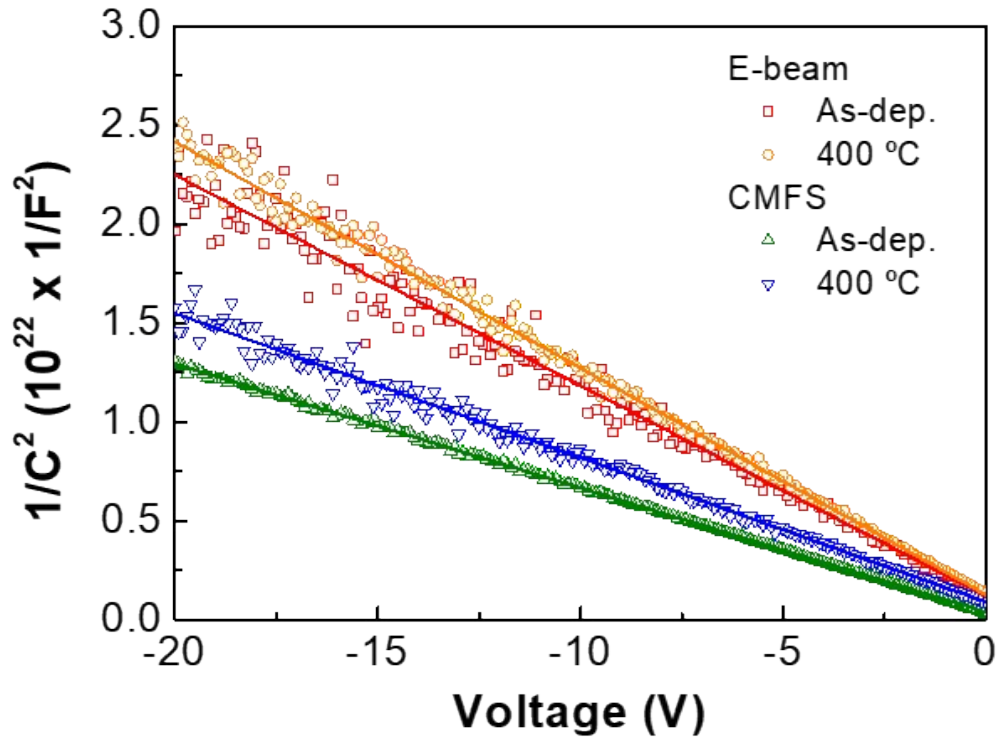

| Deposition methods | Doping concentration ( $N_d-N_a$ , $\text{cm}^{-3}$ ) |                       |
|--------------------|-------------------------------------------------------|-----------------------|
|                    | As-dep.                                               | 400 °C                |
| E-beam             | $2.66 \times 10^{16}$                                 | $2.47 \times 10^{16}$ |
| CMFS               | $4.52 \times 10^{16}$                                 | $3.88 \times 10^{16}$ |

**Fig. S1.** Capacitance-voltage ( $C$ - $V$ ) measurement on the CMFS deposited and E-beam evaporated Ni/ $\beta$ -Ga<sub>2</sub>O<sub>3</sub> SBDs with post-annealing. The doping concentration ( $N_d-N_a$ ) of drift layer was calculated about  $3 \times 10^{16} \text{ cm}^{-3}$  shown in the table.

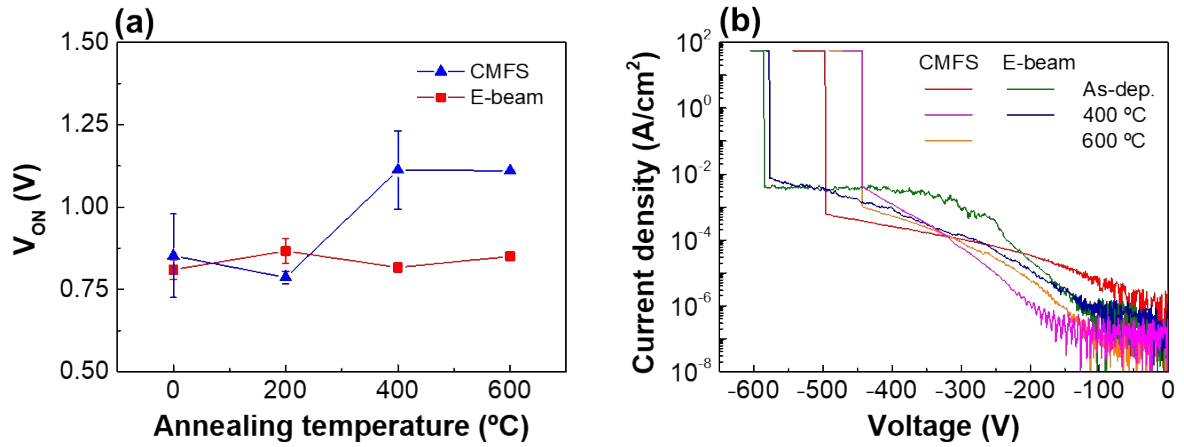

**Fig. S2.** (a) The variations of the onset voltage ( $V_{ON}$ ) and (b) reverse breakdown voltage ( $V_{BR}$ ) on CMFS deposited and E-beam evaporated Ni/ $\beta$ -Ga<sub>2</sub>O<sub>3</sub> SBDs. The  $V_{BR}$  of CMFS-Ni SBDs was varied -443 to -496 V, while which of E-beam evaporated Ni-based SBDs was varied -577 to -585 V with post-annealing temperature. In general, the reverse leakage current in the SBDs is related to the SBH, because the thermionic emission current across the SBH is a dominant component of the leakage current. In addition, some phenomena, such as field-emission, image force lowering effect, and barrier inhomogeneity can lower the SBH value. The 400  $^{\circ}C$  annealed CMFS-Ni devices have relatively higher and homogeneous SBH rather than the E-beam devices, which can lead to the low leakage current. However, it seems that there are some carrier trap regions in CMFS-Ni/ $\beta$ -Ga<sub>2</sub>O<sub>3</sub> interface, which can be accelerated to the impact ionization, lowering the  $V_{BR}$  value.

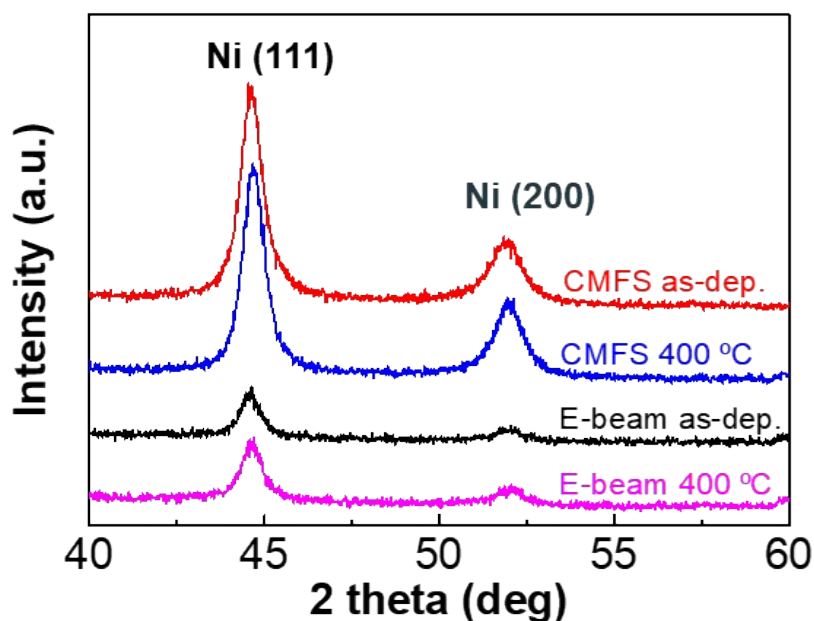

| Ni (111)       | 2θ (deg) | FWHM (deg) | Lattice constant (nm) | Average grain size (nm) |
|----------------|----------|------------|-----------------------|-------------------------|
| CMFS as-dep.   | 44.65    | 0.73       | 0.410                 | 11.51                   |
| CMFS 400 °C    | 44.69    | 0.73       | 0.388                 | 11.59                   |
| E-beam as-dep. | 44.60    | 0.64       | 0.439                 | 13.03                   |
| E-beam 400 °C  | 44.63    | 0.69       | 0.423                 | 12.14                   |

**Fig. S3.** The XRD analysis of the Ni with CMFS and E-beam evaporation methods. The diffraction peaks at  $2\theta = 44.6^\circ$  and  $51.9^\circ$  were assigned to the (111) and (200) crystal planes of the Ni. (JCPDS #04-0850) The table shows the parameters of Ni (111) peaks, which are the  $2\theta$  center of peak, full width at half maximum (FWHM), lattice constant, and average grain size calculated using the Scherrer equation. All Ni peaks were slightly shifted to the increasing  $2\theta$  angle after post-annealing due to the decrease in the lattice constant with relaxation of crystal.

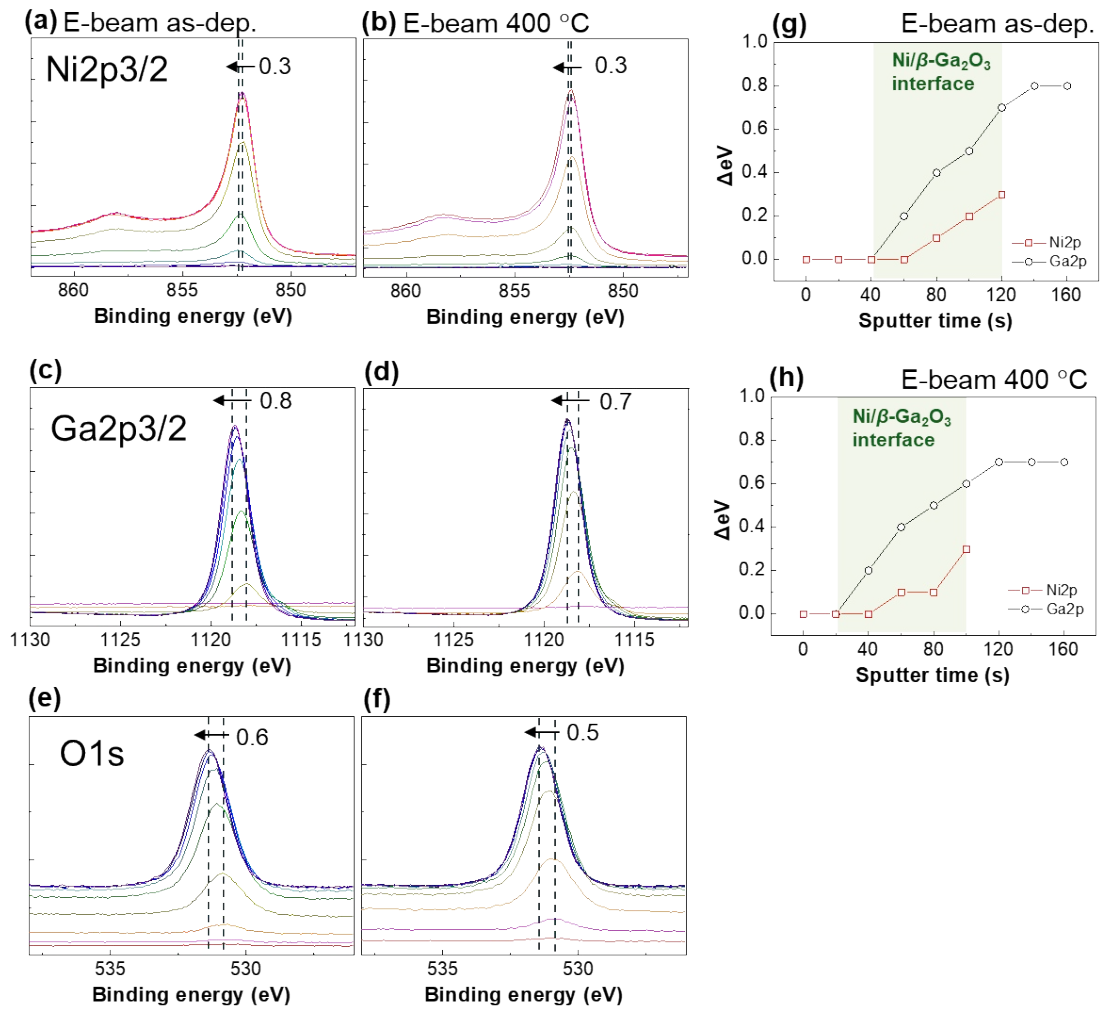

**Fig. S4.** The XPS depth-profiling analysis with the E-beam evaporated Ni/ $\beta$ -Ga<sub>2</sub>O<sub>3</sub> interface. (a,c,e) As-deposited and (b,d,f) post-annealed at 400 °C with Ni<sub>2p</sub>, Ga<sub>2p</sub>, and O<sub>1s</sub> spectrums, respectively. (g, h) The shift of binding energies of Ni<sub>2p</sub> and Ga<sub>2p</sub> peaks as increasing interfacial depth. No additional Ni diffusion was identified with post-treatment.
